# Supplementary material
Source: HighWire-hosted journal article supplement (https://diabetes.diabetesjournals.org/content/suppl/2007/05/18/db06-1017)

**Supplementary Figure 1** Linkage disequilibrium structure of a 41 kb region spanning ESR1 intron 1 – intron 2 in African American controls (n=635), determined using the solid spine of LD option of Haploview, with blocks extended if pairwise  $D' > 0.80$ .  $D'$  values are displayed in the squares. Empty red squares have a pairwise  $D' = 1.00$ . Red squares indicate high pairwise LD, gradually coloring down to white squares of low pairwise LD. Blue squares indicate high LD, but low significance.

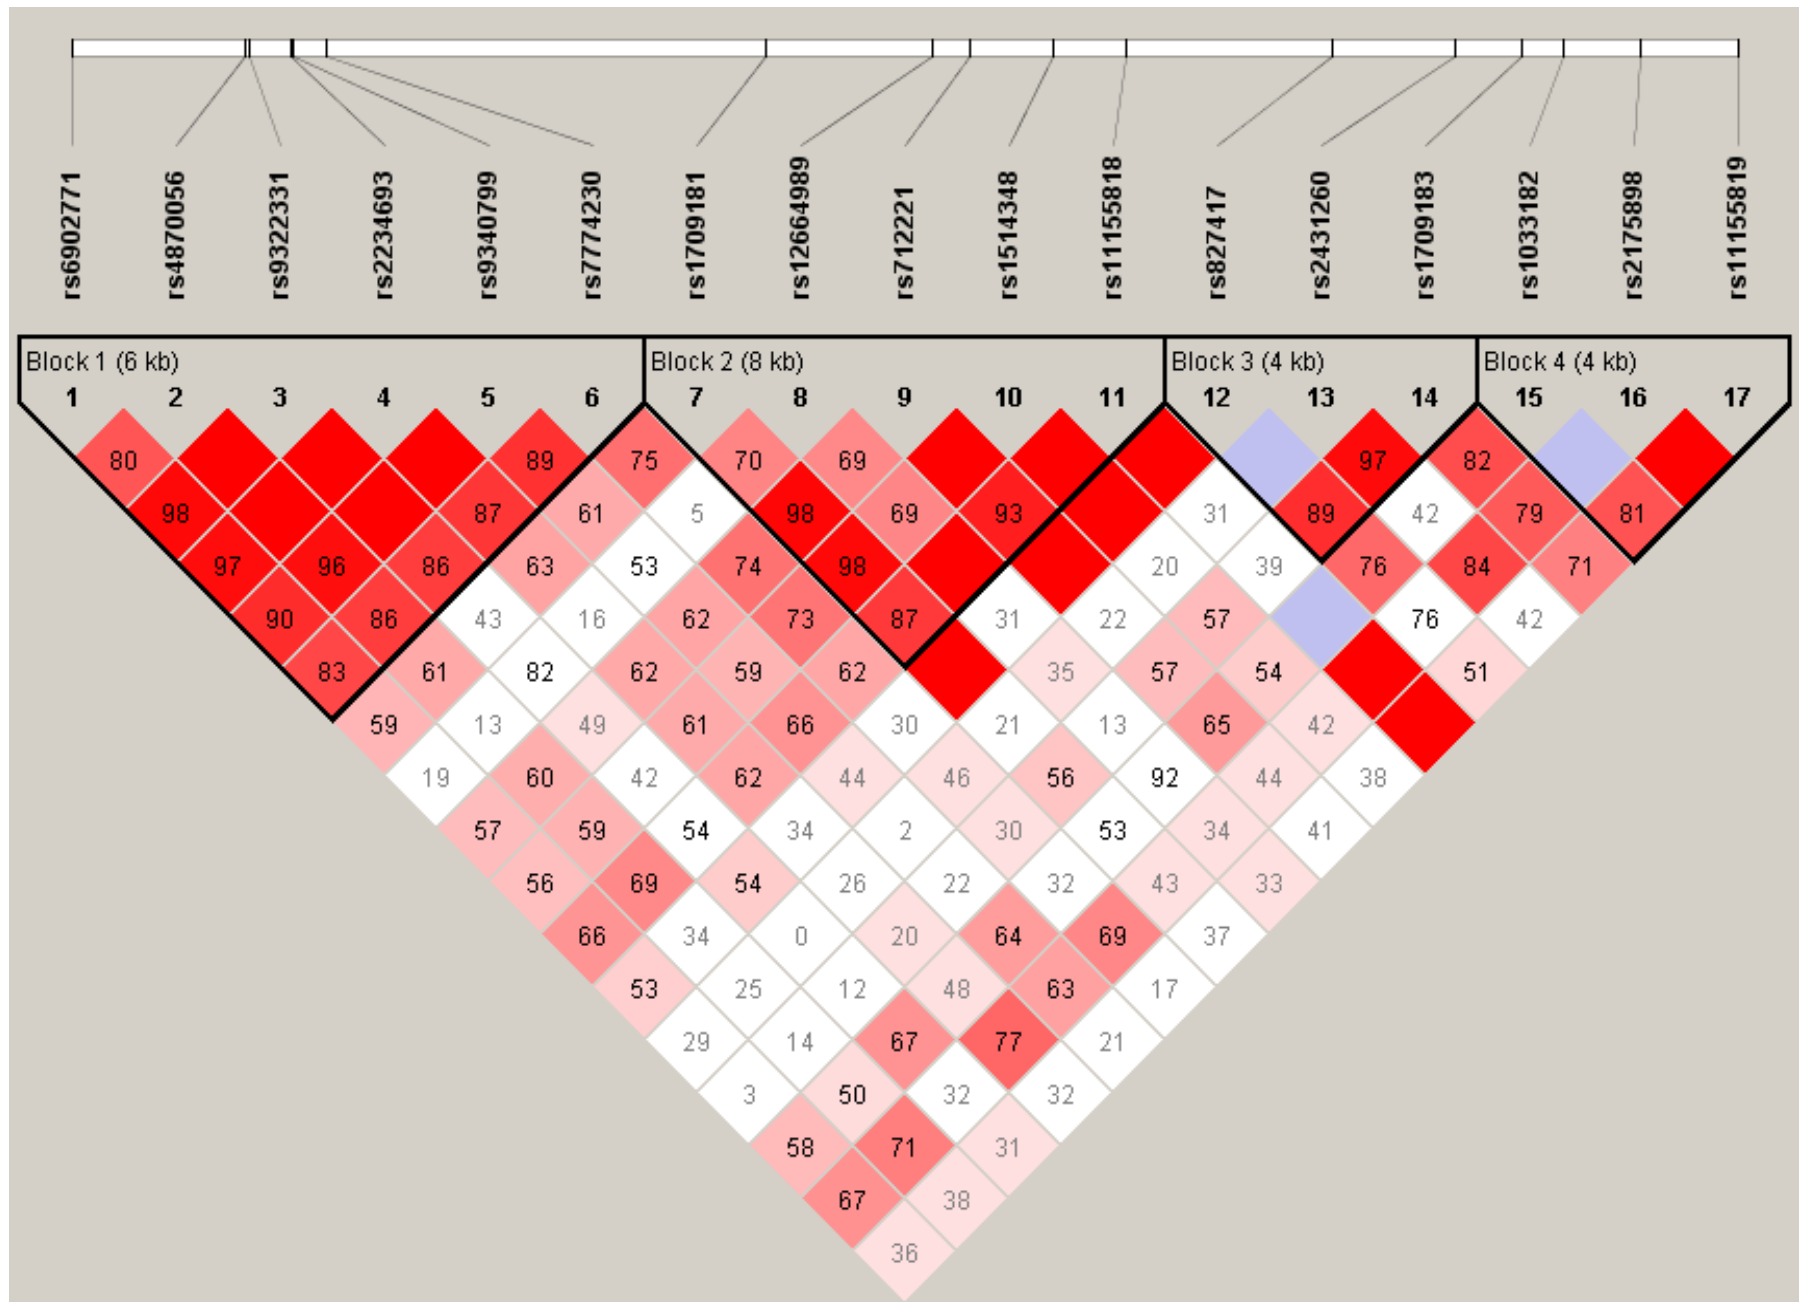

Supplement: db061017OnlineAppendixFigure.pdf [file db061017OnlineAppendixFigure.pdf]
